# Supplementary material for: H3K9me3 demethylase Kdm4d facilitates the formation of pre-initiative complex and regulates DNA replication
Source: PubMed Central journal article supplement — Nucleic Acids Res. 2016 Sep 26;45(1):169–80. doi: 10.1093/nar/gkw848 (PMC5224507; doi:10.1093/nar/gkw848), 2016-09-26

## Supporting information

Table S1. Candidate list

| Candidate | EdU <sup>&amp;</sup> | Description                                                                                             |
|-----------|----------------------|---------------------------------------------------------------------------------------------------------|
| PRMT5     | 57.10 ± 11.99 %      | Histone-Arginine N-Methyltransferase PRMT5                                                              |
| SIRT5     | 55.69 ± 3.88 %       | NAD-Dependent Deacetylase Sirtuin-5                                                                     |
| UBE2B     | 55.50 ± 0.90 %       | Ubiquitin-Conjugating Enzyme E2B                                                                        |
| L3MBTL1   | 52.55 ± 9.18 %       | L(3)Mbt-Like 1                                                                                          |
| MBD1      | 46.84 ± 16.41 %      | Methyl-CpG Binding Domain Protein 1                                                                     |
| DNMT1     | 45.74 ± 11.58 %      | DNA (Cytosine-5-)-Methyltransferase 1                                                                   |
| SMARCD3   | 44.54 ± 0.76%        | SWI/SNF Related, Matrix Associated,<br>Actin Dependent Regulator Of Chromatin, Subfamily D,<br>Member 3 |
| HDAC7     | 38.90 ± 5.22 %       | Histone Deacetylase 7                                                                                   |
| KDM4D     | 31.16 ± 4.33 %       | Jumonji Domain-Containing Protein 2D                                                                    |
| HLTF      | 24.81 ± 10.56 %      | Helicase-Like Transcription Factor                                                                      |

<sup>&</sup> EdU positive cell number represented by mean ± SD

Table S2. Primer list

| Name             | Sequence                 |
|------------------|--------------------------|
| KDM4A FWD        | AGCTTGCTTAAAGGCTGACG     |
| KDM4A REV        | GAAGTTTCAGTGAGCGGGAG     |
| KDM4B FWD        | ATCTTGACCATGTCCTTCCG     |
| KDM4B REV        | TCAACTGCGCAGAATCTACC     |
| KDM4D FWD        | GGGCAGGGGTGTTTACTCAAT    |
| KDM4D REV        | TGTTTGCCAAATGGCGATACT    |
| Myc -7kb FWD     | GAGTTGGCAACCCTTGATGT     |
| Myc -7kb REV     | GTTAGGATTTCCCGCCTTTC     |
| Myc origin FWD   | TACAGACTGGCAGAGAGCAG     |
| Myc origin REV   | ATGTATGCACAGCTATCTGG     |
| Myc +7kb FWD     | GGTTCTAAGATGCTTCCTGG     |
| Myc +7kb REV     | TGGTTGTGAAGGCAGCAGAA     |
| MCM4 -5kb FWD    | TACCTGTGGGTAAGAGATGAGTTG |
| MCM4 -5kb REV    | TGCCTGTTCCCAAATGCTATATGC |
| MCM4 Origin FWD  | AAACCAGAAGTAGGCCTCGCTCGG |
| MCM4 Origin REV  | GTCTGACCTGCGGAGGTAGTTTGG |
| MCM4 +5kb FWD    | ATCTCGCCTAATCCCACCAGTACC |
| MCM4 +5kb REV    | ATATTCACTACTAGACCCTCCGG  |
| LNMB origin FWD  | GCGTCACAGCACAAACCTGC     |
| LMNB2 origin REV | GAGGCAGAACCTAAAATCAAA    |
| LMNB2 -6kb FWD   | GCTGCGCTCAGGTTAAGAAG     |
| LMNB2 -6kb REV   | GTGCTCACGGCAGATAAGGT     |
| LMNB2 +6kb FWD   | CTCCTCGATGCTGACGCTAC     |
| LMNB2 +6kb REV   | TACCAGTCCCACCTTCCTTG     |

Fig. S1. (Relate to Fig. 1)

(A) Heatmap of DNA replication defects screening. The color scheme represents the degree of defect. (B) Expression of *KDM4A*, *KDM4B*, and *KDM4D* in HeLa cells with shRNAs targeting *KDM4D* was examined by quantitative polymerase chain reaction (qPCR). (C) Analysis of Kdm4d depletion in U2OS and HCT116 cells by Western blot analysis. Two shRNAs targeting human (sh-h1 and sh-h2) or non-target shRNA (NT) was used for depletion of human Kdm4d, and proteins in whole cell extracts were analyzed. (D-F) Depletion of Kdm4d in U2OS and HCT116 cells results in reduced 5-ethynyl-2'-deoxyuridine (EdU)-positive cells and EdU intensity. Representative images of EdU staining in U2OS and HCT116 cells with and without Kdm4d are shown in D. Scale bar: 50  $\mu$ m. Quantification of EdU-positive cell numbers (mean  $\pm$  SD) from 3 independent experiments is shown in E. Five hundred cells were counted. Quantification of the EdU fluorescence intensity (mean  $\pm$  SD) from 3 independent experiments is shown in F. Five hundred cells were counted. (G) Depletion of Kdm4d results in reduced S phase cells. U2OS and HCT116 cells with and without Kdm4d depletion were stained with 5-bromo-2'-deoxyuridine (BrdU) and propidium iodide (PI) and analyzed by flow cytometry. \*\*\*  $P < 0.001$ .

Fig. S2. (Relate to Fig. S3)

(A) HeLa cells stably expressing wild-type H3.1, H3.1 K9M, H3.1 K27M, wild-type H3.3, H3.3 K9M, and H3.3 K27M mutants were stained with H3K9me3 and H3K27me3 antibody. Representative images are shown. Scale bar: 200  $\mu$ m. (B-D) Expression of H3K9M mutant rescued reduction of 5-ethynyl-2'-deoxyuridine (EdU)-positive cells in Kdm4d-depleted cells. HeLa cells stably expressing wild-type H3.3 and K9M, K27M mutants were infected with virus expressing shRNA targeting *KDM4D*. (B) The whole cell lysates were subjected to Western blotting using indicated antibodies. (C) Representative EdU staining images are shown. Scale bar: 50  $\mu$ m. (D) Quantification of EdU-positive cell numbers (mean  $\pm$  SD) from 3 independent experiments is shown. Five hundred cells were counted. (E) Expression of H3K9M mutant rescued reduction of S phase cells in Kdm4d-depleted cells. HeLa cells stably expressing wild-type H3.3 and K9M, K27M mutants with and without Kdm4d depletion were stained with 5-bromo-2'-deoxyuridine (BrdU) and propidium iodide (PI) and analyzed by flow cytometry. \*\*\*  $P < 0.001$ .

Fig S3. (Relate to Fig. 4)

(A) Kdm4d was stained in HeLa and U2OS cells transduced with control shRNA (NT) and shRNAs targeting *KDM4D* (sh-h1 and sh-h2). Representative images are shown. Scale bar: 50  $\mu\text{m}$ . (B) Kdm4d and EdU or PCNA were co-stained in HeLa and NIH-3T3, respectively. Representative images are shown. Scale bar: 5  $\mu\text{m}$ . (C) Kdm4d dissociated from chromatin at different stages in M phase. Representative images from different mitotic stages are shown. Inter, interphase; Prometa, prometaphase; Meta, metaphase; Ana, anaphase; Tel, telophase. Scale bar: 5  $\mu\text{m}$ . (D) FACS of synchronized HeLa cells. Asy, asynchronous cells; G1, mimosine arrested; S1, thymidine arrested and release for 2 hours; S2, thymidine arrested and release for 4 hours; G2/M, nocodazole arrested. (E) Western blot analysis of the whole cell lysates (WCE) and the chromatin fractions (Chr.) of cells synchronized as in C.



**Fig. S1**

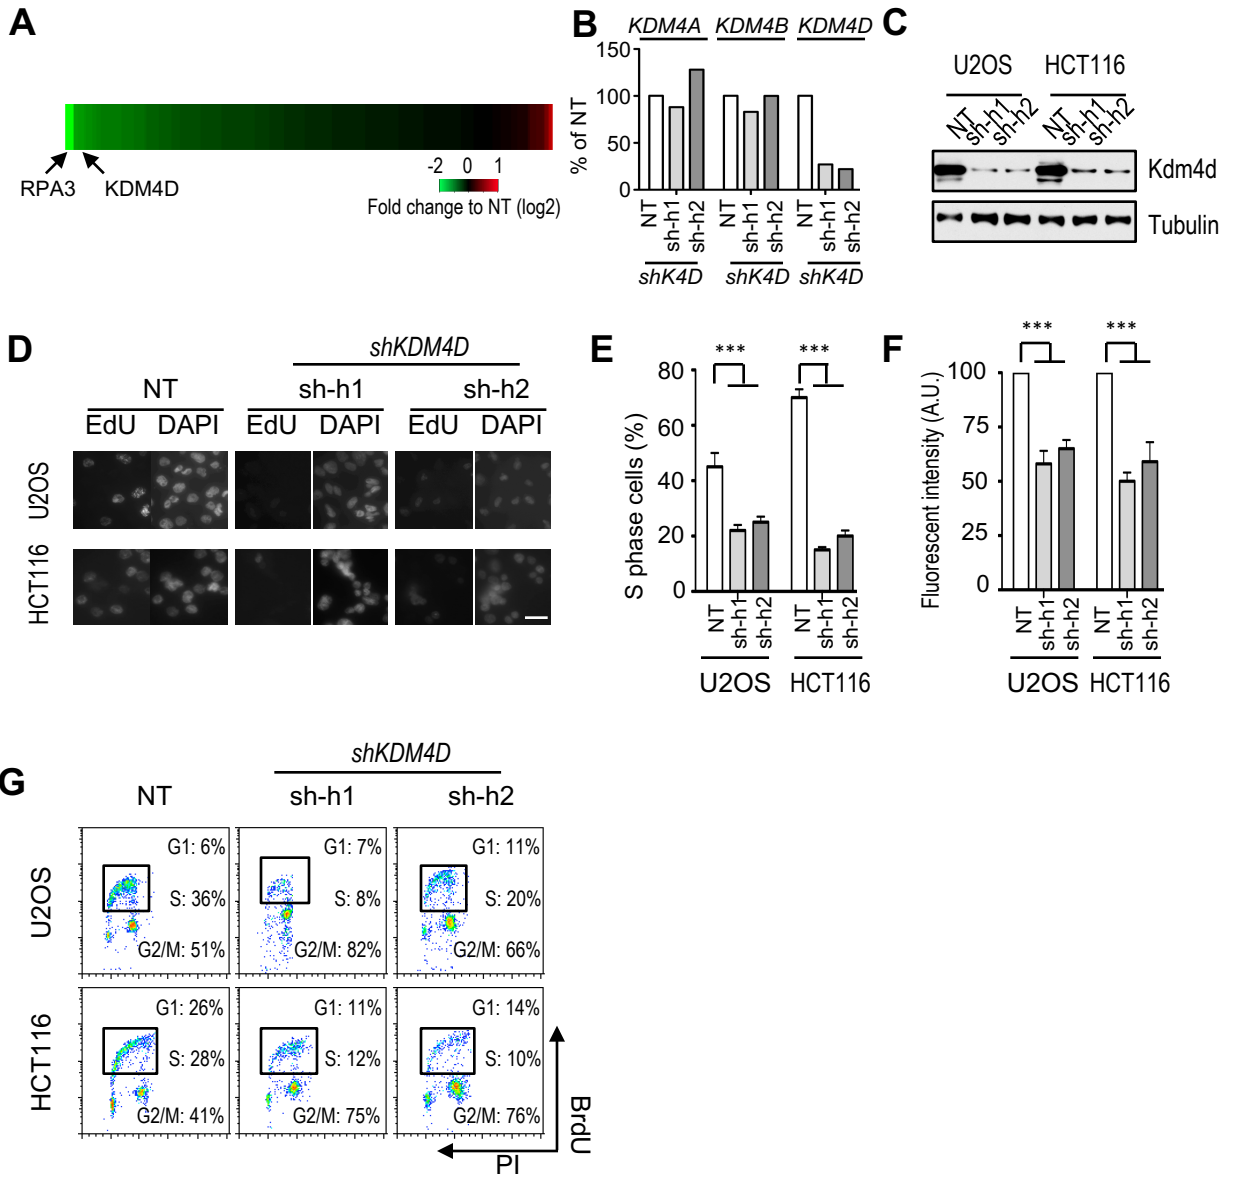

**Fig. S2**

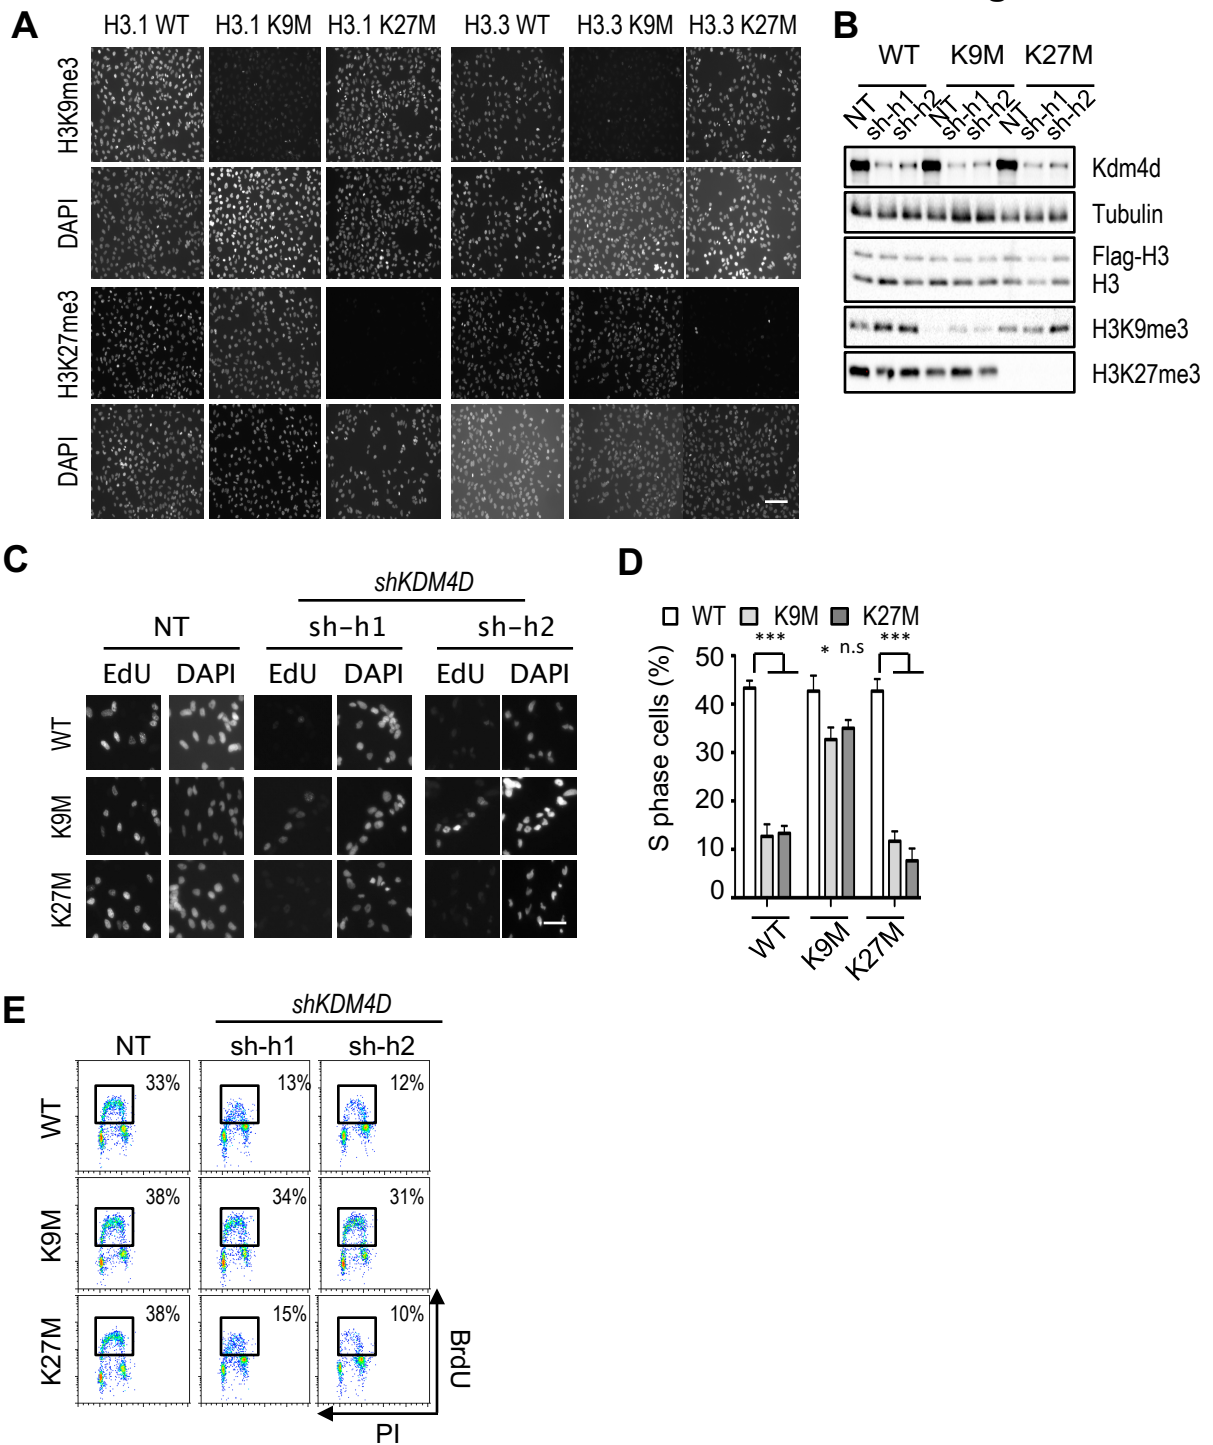

**Fig. S3****A**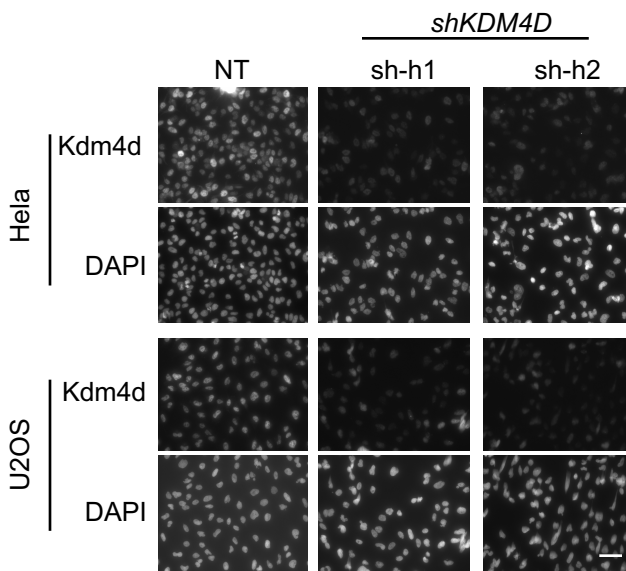**B**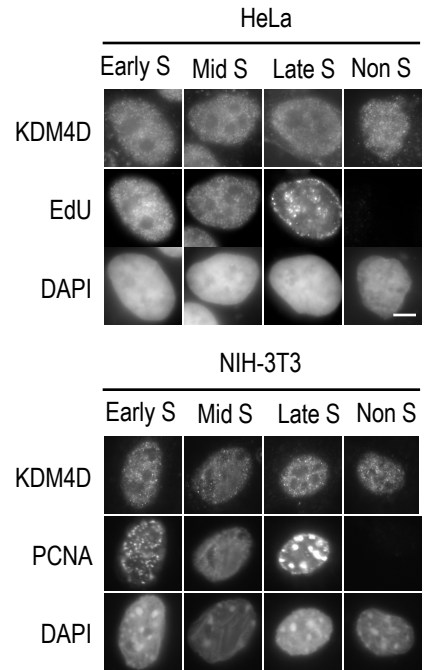**C**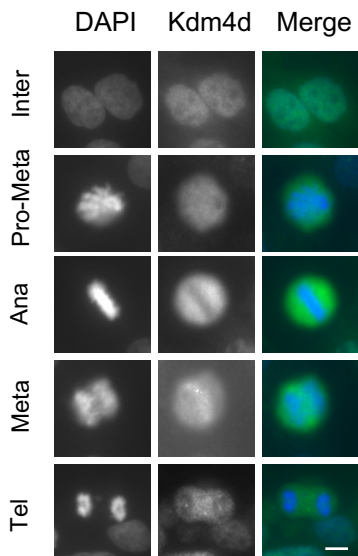**D**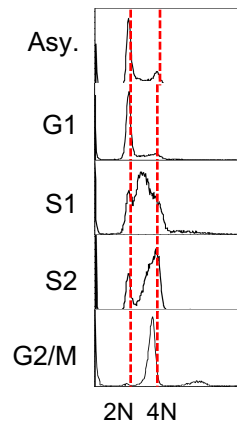**E**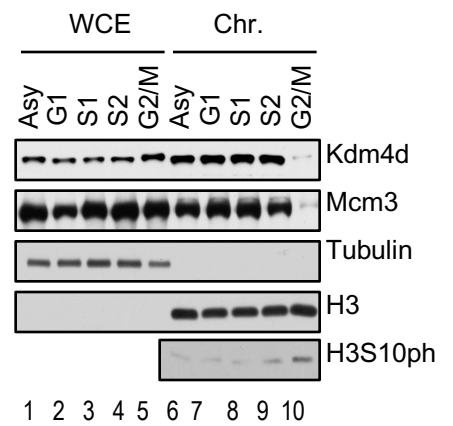

Supplement: supp_gkw848_nar-02151-m-2016-File008.pdf [file supp_gkw848_nar-02151-m-2016-File008.pdf]
